# Supplementary material
Source: PubMed Central journal article supplement (PMC6150811)

**Supplemental Table 1.** Odds ratios (OR) for progression to dengue hemorrhagic fever/dengue shock syndrome by quintile (Q) of serum fatty acids (FA) %

| Fatty acid <sup>1</sup>             | Q1    | Q2                | Q3                | Q4                | Q5                | <i>P</i> , trend <sup>4</sup> |
|-------------------------------------|-------|-------------------|-------------------|-------------------|-------------------|-------------------------------|
| SFAs (%)                            |       |                   |                   |                   |                   |                               |
| 14:0 myristic acid                  |       |                   |                   |                   |                   |                               |
| Median                              | 0.13  | 0.22              | 0.31              | 0.40              | 0.60              |                               |
| Controls:Cases                      | 47:24 | 47:33             | 47:16             | 47:20             | 47:16             |                               |
| Unadjusted OR (95% CI) <sup>2</sup> | 1.00  | 1.38 (0.71, 2.67) | 0.67 (0.31, 1.41) | 0.83 (0.41, 1.71) | 0.67 (0.31, 1.41) | 0.11                          |
| Adjusted OR (95% CI) <sup>3</sup>   | 1.00  | 1.17 (0.58, 2.34) | 0.60 (0.28, 1.31) | 0.68 (0.32, 1.44) | 0.53 (0.24, 1.17) | 0.04                          |
| 15:0 pentadecanoic acid             |       |                   |                   |                   |                   |                               |
| Median                              | 0.11  | 0.14              | 0.16              | 0.19              | 0.24              |                               |
| Controls:Cases                      | 46:27 | 47:27             | 47:23             | 47:22             | 47:9              |                               |
| Unadjusted OR (95% CI)              | 1.00  | 0.98 (0.50, 1.91) | 0.83 (0.42, 1.66) | 0.80 (0.40, 1.60) | 0.33 (0.14, 0.77) | 0.01                          |
| Adjusted OR (95% CI)                | 1.00  | 0.79 (0.39, 1.61) | 0.62 (0.30, 1.29) | 0.61 (0.29, 1.27) | 0.27 (0.11, 0.66) | 0.003                         |
| 16:0 palmitic acid                  |       |                   |                   |                   |                   |                               |
| Median                              | 20.66 | 22.36             | 23.36             | 24.47             | 26.11             |                               |
| Controls:Cases                      | 47:23 | 47:28             | 47:31             | 47:9              | 47:18             |                               |
| Unadjusted OR (95% CI)              | 1.00  | 1.22 (0.61, 2.41) | 1.35 (0.69, 2.64) | 0.39 (0.16, 0.93) | 0.78 (0.37, 1.64) | 0.14                          |
| Adjusted OR (95% CI)                | 1.00  | 1.06 (0.52, 2.16) | 1.23 (0.61, 2.48) | 0.36 (0.15, 0.89) | 0.68 (0.31, 1.49) | 0.08                          |
| 17:0 margaric acid                  |       |                   |                   |                   |                   |                               |
| Median                              | 0.28  | 0.33              | 0.36              | 0.39              | 0.47              |                               |
| Controls:Cases                      | 46:29 | 47:21             | 47:23             | 47:21             | 47:14             |                               |
| Unadjusted OR (95% CI)              | 1.00  | 0.71 (0.35, 1.42) | 0.78 (0.39, 1.53) | 0.71 (0.35, 1.42) | 0.47 (0.22, 1.01) | 0.07                          |
| Adjusted OR (95% CI)                | 1.00  | 0.65 (0.32, 1.35) | 0.77 (0.38, 1.57) | 0.69 (0.34, 1.44) | 0.48 (0.22, 1.05) | 0.09                          |
| 18:0 stearic acid                   |       |                   |                   |                   |                   |                               |
| Median                              | 6.83  | 7.52              | 7.93              | 8.49              | 9.49              |                               |
| Controls:Cases                      | 47:30 | 47:26             | 47:16             | 47:27             | 47:10             |                               |
| Unadjusted OR (95% CI)              | 1.00  | 0.87 (0.45, 1.68) | 0.53 (0.26, 1.11) | 0.90 (0.47, 1.74) | 0.33 (0.15, 0.76) | 0.02                          |
| Adjusted OR (95% CI)                | 1.00  | 0.92 (0.46, 1.85) | 0.61 (0.28, 1.30) | 1.06 (0.54, 2.12) | 0.40 (0.17, 0.95) | 0.09                          |

| Fatty acid <sup>1</sup>  | Q1    | Q2                | Q3                | Q4                | Q5                | <i>P</i> , trend <sup>4</sup> |
|--------------------------|-------|-------------------|-------------------|-------------------|-------------------|-------------------------------|
| 20:0 arachidic acid      |       |                   |                   |                   |                   |                               |
| Median                   | 0.11  | 0.13              | 0.15              | 0.17              | 0.21              |                               |
| Controls:Cases           | 47:15 | 47:16             | 47:31             | 47:25             | 47:22             |                               |
| Unadjusted OR (95% CI)   | 1.00  | 1.07 (0.47, 2.40) | 2.07 (0.99, 4.32) | 1.67 (0.78, 3.55) | 1.47 (0.68, 3.17) | 0.29                          |
| Adjusted OR (95% CI)     | 1.00  | 1.02 (0.44, 2.38) | 2.07 (0.96, 4.45) | 1.84 (0.83, 4.07) | 1.42 (0.63, 3.18) | 0.30                          |
| 22:0 behenic acid        |       |                   |                   |                   |                   |                               |
| Median                   | 0.19  | 0.28              | 0.33              | 0.39              | 0.46              |                               |
| Controls:Cases           | 47:20 | 47:17             | 47:15             | 47:21             | 47:36             |                               |
| Unadjusted OR (95% CI)   | 1.00  | 0.85 (0.40, 1.82) | 0.75 (0.34, 1.64) | 1.05 (0.50, 2.19) | 1.80 (0.91, 3.55) | 0.06                          |
| Adjusted OR (95% CI)     | 1.00  | 0.78 (0.36, 1.72) | 0.68 (0.30, 1.54) | 1.07 (0.50, 2.28) | 1.71 (0.84, 3.48) | 0.08                          |
| 24:0 lignoceric acid     |       |                   |                   |                   |                   |                               |
| Median                   | 0.05  | 0.24              | 0.30              | 0.34              | 0.43              |                               |
| Controls:Cases           | 47:18 | 47:22             | 47:20             | 47:10             | 47:39             |                               |
| Unadjusted OR (95% CI)   | 1.00  | 1.22 (0.58, 2.57) | 1.11 (0.52, 2.36) | 0.56 (0.23, 1.33) | 2.17 (1.09, 4.32) | 0.11                          |
| Adjusted OR (95% CI)     | 1.00  | 0.75 (0.34, 1.67) | 0.82 (0.37, 1.82) | 0.40 (0.16, 1.00) | 1.68 (0.80, 3.52) | 0.34                          |
| Total SFAs               |       |                   |                   |                   |                   |                               |
| Median                   | 30.01 | 31.71             | 33.07             | 34.32             | 36.09             |                               |
| Controls:Cases           | 47:17 | 47:43             | 47:20             | 47:17             | 47:12             |                               |
| Unadjusted OR (95% CI)   | 1.00  | 2.53 (1.27, 5.05) | 1.18 (0.55, 2.52) | 1.00 (0.46, 2.19) | 0.71 (0.30, 1.64) | 0.05                          |
| Adjusted OR (95% CI)     | 1.00  | 2.52 (1.23, 5.17) | 1.04 (0.47, 2.28) | 1.00 (0.44, 2.27) | 0.66 (0.27, 1.58) | 0.04                          |
| MUFAs (%)                |       |                   |                   |                   |                   |                               |
| 16:1n-7 palmitoleic acid |       |                   |                   |                   |                   |                               |
| Median                   | 1.21  | 1.49              | 1.69              | 2.04              | 2.53              |                               |
| Controls:Cases           | 47:23 | 47:17             | 47:24             | 47:30             | 47:15             |                               |
| Unadjusted OR (95% CI)   | 1.00  | 0.74 (0.35, 1.56) | 1.04 (0.52, 2.10) | 1.30 (0.66, 2.57) | 0.65 (0.30, 1.40) | 0.66                          |
| Adjusted OR (95% CI)     | 1.00  | 0.71 (0.33, 1.54) | 0.87 (0.42, 1.81) | 1.16 (0.57, 2.40) | 0.49 (0.21, 1.14) | 0.29                          |

| Fatty acid <sup>1</sup>           | Q1    | Q2                | Q3                | Q4                | Q5                | <i>P</i> , trend <sup>4</sup> |
|-----------------------------------|-------|-------------------|-------------------|-------------------|-------------------|-------------------------------|
| 18:1n-9 oleic acid                |       |                   |                   |                   |                   |                               |
| Median                            | 19.88 | 21.85             | 23.17             | 24.69             | 27.13             |                               |
| Controls:Cases                    | 47:21 | 47:20             | 47:23             | 47:19             | 47:26             |                               |
| Unadjusted OR (95% CI)            | 1.00  | 0.95 (0.46, 1.98) | 1.10 (0.53, 2.24) | 0.90 (0.43, 1.90) | 1.24 (0.61, 2.50) | 0.58                          |
| Adjusted OR (95% CI)              | 1.00  | 1.03 (0.48, 2.20) | 1.30 (0.61, 2.75) | 0.96 (0.44, 2.12) | 1.52 (0.69, 3.36) | 0.37                          |
| 18:1n-7 <i>cis</i> -vaccenic acid |       |                   |                   |                   |                   |                               |
| Median                            | 1.61  | 1.92              | 2.25              | 2.56              | 3.06              |                               |
| Controls:Cases                    | 47:13 | 47:19             | 47:27             | 47:24             | 47:26             |                               |
| Unadjusted OR (95% CI)            | 1.00  | 1.46 (0.65, 3.30) | 2.08 (0.96, 4.51) | 1.85 (0.84, 4.05) | 2.00 (0.92, 4.36) | 0.09                          |
| Adjusted OR (95% CI)              | 1.00  | 1.31 (0.57, 3.05) | 1.60 (0.71, 3.61) | 1.28 (0.56, 2.94) | 1.42 (0.62, 3.24) | 0.55                          |
| 20:1n-9 gondoic acid              |       |                   |                   |                   |                   |                               |
| Median                            | 0.14  | 0.16              | 0.18              | 0.21              | 0.26              |                               |
| Controls:Cases                    | 47:25 | 47:12             | 47:19             | 47:29             | 47:24             |                               |
| Unadjusted OR (95% CI)            | 1.00  | 0.48 (0.22, 1.07) | 0.76 (0.37, 1.56) | 1.16 (0.59, 2.27) | 0.96 (0.48, 1.92) | 0.40                          |
| Adjusted OR (95% CI)              | 1.00  | 0.48 (0.21, 1.09) | 0.79 (0.37, 1.68) | 1.16 (0.56, 2.41) | 0.95 (0.45, 2.02) | 0.47                          |
| 24:1n-9 nervonic acid             |       |                   |                   |                   |                   |                               |
| Median                            | 0.12  | 0.32              | 0.42              | 0.52              | 0.70              |                               |
| Controls:Cases                    | 47:20 | 47:15             | 47:21             | 47:26             | 47:27             |                               |
| Unadjusted OR (95% CI)            | 1.00  | 0.75 (0.34, 1.64) | 1.05 (0.50, 2.19) | 1.30 (0.64, 2.64) | 1.35 (0.67, 2.73) | 0.21                          |
| Adjusted OR (95% CI)              | 1.00  | 0.60 (0.27, 1.37) | 0.81 (0.37, 1.76) | 1.02 (0.48, 2.16) | 1.12 (0.53, 2.38) | 0.45                          |
| Total MUFAs                       |       |                   |                   |                   |                   |                               |
| Median                            | 23.80 | 26.42             | 28.05             | 29.70             | 32.32             |                               |
| Controls:Cases                    | 47:20 | 47:25             | 47:21             | 47:14             | 47:29             |                               |
| Unadjusted OR (95% CI)            | 1.00  | 1.25 (0.61, 2.55) | 1.05 (0.50, 2.19) | 0.70 (0.32, 1.55) | 1.45 (0.72, 2.92) | 0.58                          |
| Adjusted OR (95% CI)              | 1.00  | 1.16 (0.56, 2.41) | 1.06 (0.50, 2.27) | 0.63 (0.27, 1.44) | 1.50 (0.69, 3.25) | 0.61                          |

| Fatty acid <sup>1</sup>                       | Q1    | Q2                | Q3                | Q4                | Q5                | <i>P</i> , trend <sup>4</sup> |
|-----------------------------------------------|-------|-------------------|-------------------|-------------------|-------------------|-------------------------------|
| <b>n-3 PUFAs (%)</b>                          |       |                   |                   |                   |                   |                               |
| <b>18:3n-3 α-linolenic acid</b>               |       |                   |                   |                   |                   |                               |
| Median                                        | 0.12  | 0.20              | 0.28              | 0.36              | 0.44              |                               |
| Controls:Cases                                | 47:30 | 47:25             | 47:15             | 47:21             | 47:18             |                               |
| Unadjusted OR (95% CI)                        | 1.00  | 0.83 (0.43, 1.62) | 0.50 (0.24, 1.05) | 0.70 (0.35, 1.39) | 0.60 (0.29, 1.22) | 0.12                          |
| Adjusted OR (95% CI)                          | 1.00  | 0.68 (0.34, 1.37) | 0.44 (0.20, 0.94) | 0.64 (0.31, 1.31) | 0.73 (0.35, 1.54) | 0.33                          |
| <b>20:5n-3 EPA</b>                            |       |                   |                   |                   |                   |                               |
| Median                                        | 0.16  | 0.21              | 0.25              | 0.31              | 0.42              |                               |
| Controls:Cases                                | 47:22 | 47:17             | 47:13             | 47:27             | 47:30             |                               |
| Unadjusted OR (95% CI)                        | 1.00  | 0.77 (0.36, 1.64) | 0.59 (0.27, 1.31) | 1.23 (0.61, 2.45) | 1.36 (0.69, 2.70) | 0.11                          |
| Adjusted OR (95% CI)                          | 1.00  | 0.63 (0.29, 1.41) | 0.53 (0.23, 1.21) | 0.97 (0.45, 2.07) | 1.21 (0.57, 2.54) | 0.20                          |
| <b>22:5n-3 DPA</b>                            |       |                   |                   |                   |                   |                               |
| Median                                        | 0.23  | 0.32              | 0.39              | 0.45              | 0.56              |                               |
| Controls:Cases                                | 47:20 | 47:14             | 47:20             | 47:23             | 47:32             |                               |
| Unadjusted OR (95% CI)                        | 1.00  | 0.70 (0.32, 1.55) | 1.00 (0.48, 2.10) | 1.15 (0.56, 2.37) | 1.60 (0.80, 3.19) | 0.07                          |
| Adjusted OR (95% CI)                          | 1.00  | 0.70 (0.31, 1.58) | 1.04 (0.47, 2.27) | 1.16 (0.55, 2.46) | 1.75 (0.85, 3.61) | 0.05                          |
| <b>22:6n-3 DHA</b>                            |       |                   |                   |                   |                   |                               |
| Median                                        | 0.81  | 1.11              | 1.37              | 1.68              | 2.26              |                               |
| Controls:Cases                                | 47:7  | 47:26             | 47:20             | 47:24             | 47:32             |                               |
| Unadjusted OR (95% CI)                        | 1.00  | 3.71 (1.47, 9.39) | 2.86 (1.10, 7.39) | 3.43 (1.35, 8.72) | 4.57 (1.84, 11.4) | 0.008                         |
| Adjusted OR (95% CI)                          | 1.00  | 3.60 (1.40, 9.28) | 3.26 (1.23, 8.63) | 4.00 (1.53, 10.5) | 4.67 (1.84, 11.9) | 0.007                         |
| <b>Total long chain n-3 PUFAs<sup>5</sup></b> |       |                   |                   |                   |                   |                               |
| Median                                        | 1.33  | 1.74              | 2.04              | 2.39              | 3.03              |                               |
| Controls:Cases                                | 47:10 | 47:24             | 47:16             | 47:24             | 47:35             |                               |
| Unadjusted OR (95% CI)                        | 1.00  | 2.40 (1.03, 5.57) | 1.60 (0.66, 3.89) | 2.40 (1.03, 5.57) | 3.50 (1.56, 7.87) | 0.004                         |
| Adjusted OR (95% CI)                          | 1.00  | 2.32 (0.97, 5.52) | 1.78 (0.71, 4.46) | 2.58 (1.08, 6.19) | 3.66 (1.58, 8.49) | 0.003                         |
| <b>Total n-3 PUFAs</b>                        |       |                   |                   |                   |                   |                               |
| Median                                        | 1.54  | 2.06              | 2.40              | 2.85              | 3.60              |                               |
| Controls:Cases                                | 47:13 | 47:23             | 47:17             | 47:26             | 47:30             |                               |
| Unadjusted OR (95% CI)                        | 1.00  | 1.77 (0.80, 3.90) | 1.31 (0.57, 2.99) | 2.00 (0.92, 4.36) | 2.31 (1.07, 4.97) | 0.04                          |
| Adjusted OR (95% CI)                          | 1.00  | 1.78 (0.79, 4.04) | 1.46 (0.62, 3.43) | 2.25 (1.00, 5.05) | 2.52 (1.13, 5.61) | 0.02                          |

| Fatty acid <sup>1</sup>                           | Q1    | Q2                | Q3                | Q4                | Q5                | <i>P</i> , trend <sup>4</sup> |
|---------------------------------------------------|-------|-------------------|-------------------|-------------------|-------------------|-------------------------------|
| <b>n-6 PUFAs (%)</b>                              |       |                   |                   |                   |                   |                               |
| <b>18:2n-6 linoleic acid</b>                      |       |                   |                   |                   |                   |                               |
| Median                                            | 21.90 | 24.63             | 26.5              | 28.16             | 31.12             |                               |
| Controls:Cases                                    | 47:21 | 47:25             | 47:23             | 47:24             | 47:16             |                               |
| Unadjusted OR (95% CI)                            | 1.00  | 1.19 (0.59, 2.41) | 1.10 (0.53, 2.24) | 1.14 (0.56, 2.33) | 0.76 (0.35, 1.64) | 0.51                          |
| Adjusted OR (95% CI)                              | 1.00  | 1.33 (0.64, 2.78) | 1.10 (0.52, 2.31) | 1.28 (0.61, 2.72) | 0.83 (0.37, 1.86) | 0.66                          |
| <b>18:3n-6 <math>\gamma</math>-linolenic acid</b> |       |                   |                   |                   |                   |                               |
| Median                                            | 0.07  | 0.14              | 0.24              | 0.32              | 0.40              |                               |
| Controls:Cases                                    | 47:20 | 47:11             | 47:29             | 47:22             | 47:27             |                               |
| Unadjusted OR (95% CI)                            | 1.00  | 0.55 (0.24, 1.27) | 1.45 (0.72, 2.92) | 1.10 (0.53, 2.28) | 1.35 (0.67, 2.73) | 0.14                          |
| Adjusted OR (95% CI)                              | 1.00  | 0.57 (0.24, 1.36) | 1.33 (0.64, 2.79) | 0.94 (0.43, 2.03) | 1.07 (0.50, 2.26) | 0.56                          |
| <b>20:2n-6 EDA</b>                                |       |                   |                   |                   |                   |                               |
| Median                                            | 0.15  | 0.20              | 0.23              | 0.25              | 0.31              |                               |
| Controls:Cases                                    | 47:14 | 47:35             | 47:14             | 47:18             | 47:28             |                               |
| Unadjusted OR (95% CI)                            | 1.00  | 2.50 (1.19, 5.24) | 1.00 (0.43, 2.33) | 1.29 (0.57, 2.88) | 2.00 (0.94, 4.27) | 0.34                          |
| Adjusted OR (95% CI)                              | 1.00  | 1.96 (0.91, 4.21) | 0.71 (0.29, 1.72) | 1.00 (0.43, 2.33) | 1.52 (0.69, 3.34) | 0.74                          |
| <b>20:3n-6 dihomogamma-linolenic acid</b>         |       |                   |                   |                   |                   |                               |
| Median                                            | 0.91  | 1.14              | 1.34              | 1.55              | 1.98              |                               |
| Controls:Cases                                    | 47:31 | 47:22             | 47:23             | 47:17             | 47:16             |                               |
| Unadjusted OR (95% CI)                            | 1.00  | 0.71 (0.36, 1.40) | 0.74 (0.38, 1.46) | 0.55 (0.27, 1.12) | 0.52 (0.25, 1.07) | 0.06                          |
| Adjusted OR (95% CI)                              | 1.00  | 0.65 (0.32, 1.33) | 0.66 (0.32, 1.34) | 0.52 (0.25, 1.10) | 0.39 (0.18, 0.87) | 0.02                          |
| <b>20:4n-6 arachidonic acid</b>                   |       |                   |                   |                   |                   |                               |
| Median                                            | 4.23  | 5.32              | 6.09              | 6.87              | 8.16              |                               |
| Controls:Cases                                    | 47:10 | 47:24             | 47:20             | 47:25             | 47:30             |                               |
| Unadjusted OR (95% CI)                            | 1.00  | 2.40 (1.03, 5.57) | 2.00 (0.85, 4.73) | 2.50 (1.08, 5.78) | 3.00 (1.32, 6.82) | 0.02                          |
| Adjusted OR (95% CI)                              | 1.00  | 2.17 (0.90, 5.24) | 2.25 (0.91, 5.55) | 2.64 (1.09, 6.40) | 3.07 (1.28, 7.36) | 0.02                          |
| <b>22:4n-6 adrenic acid</b>                       |       |                   |                   |                   |                   |                               |
| Median                                            | 0.22  | 0.28              | 0.35              | 0.50              | 0.97              |                               |
| Controls:Cases                                    | 47:16 | 47:14             | 47:24             | 47:20             | 47:35             |                               |
| Unadjusted OR (95% CI)                            | 1.00  | 0.88 (0.38, 1.99) | 1.50 (0.71, 3.18) | 1.25 (0.58, 2.70) | 2.19 (1.07, 4.48) | 0.01                          |
| Adjusted OR (95% CI)                              | 1.00  | 0.82 (0.36, 1.91) | 1.49 (0.68, 3.23) | 1.13 (0.51, 2.49) | 1.77 (0.84, 3.74) | 0.08                          |

| Fatty acid <sup>1</sup>                       | Q1    | Q2                | Q3                | Q4                | Q5                | <i>P</i> , trend <sup>4</sup> |
|-----------------------------------------------|-------|-------------------|-------------------|-------------------|-------------------|-------------------------------|
| <b>Total long chain n-6 PUFAs<sup>6</sup></b> |       |                   |                   |                   |                   |                               |
| Median                                        | 6.24  | 7.29              | 8.08              | 9.02              | 10.47             |                               |
| Controls:Cases                                | 47:8  | 47:20             | 47:26             | 47:23             | 47:32             |                               |
| Unadjusted OR (95% CI)                        | 1.00  | 2.50 (1.00, 6.24) | 3.25 (1.34, 7.91) | 2.87 (1.17, 7.07) | 4.00 (1.67, 9.58) | 0.004                         |
| Adjusted OR (95% CI)                          | 1.00  | 2.12 (0.82, 5.45) | 2.94 (1.17, 7.35) | 2.62 (1.03, 6.66) | 3.75 (1.52, 9.29) | 0.006                         |
| <b>Total n-6 PUFAs</b>                        |       |                   |                   |                   |                   |                               |
| Median                                        | 29.55 | 32.56             | 34.83             | 37.21             | 40.48             |                               |
| Controls:Cases                                | 47:17 | 47:24             | 47:17             | 47:30             | 47:21             |                               |
| Unadjusted OR (95% CI)                        | 1.00  | 1.41 (0.67, 2.96) | 1.00 (0.46, 2.19) | 1.76 (0.86, 3.62) | 1.24 (0.58, 2.63) | 0.45                          |
| Adjusted OR (95% CI)                          | 1.00  | 1.31 (0.61, 2.83) | 0.97 (0.43, 2.21) | 1.68 (0.79, 3.61) | 1.26 (0.56, 2.84) | 0.44                          |
| <b>18:2n-7<i>ct</i> CLA (%)</b>               |       |                   |                   |                   |                   |                               |
| Median                                        |       | 0.00              |                   | 0.08              | 0.13              |                               |
| Controls:Cases                                |       | 141:71            |                   | 47:23             | 47:15             |                               |
| Unadjusted OR (95% CI)                        |       | 1.00              |                   | 0.97 (0.55, 1.73) | 0.63 (0.33, 1.21) | 0.23                          |
| Adjusted OR (95% CI)                          |       | 1.00              |                   | 1.01 (0.55, 1.86) | 0.68 (0.35, 1.35) | 0.37                          |
| <b><i>trans</i>-fatty acids (%)</b>           |       |                   |                   |                   |                   |                               |
| <b>16:1n-7 <i>trans</i></b>                   |       |                   |                   |                   |                   |                               |
| Median                                        | 0.12  | 0.17              | 0.21              | 0.25              | 0.34              |                               |
| Controls:Cases                                | 47:27 | 47:18             | 47:21             | 47:17             | 47:26             |                               |
| Unadjusted OR (95% CI)                        | 1.00  | 0.67 (0.32, 1.37) | 0.78 (0.39, 1.56) | 0.63 (0.30, 1.31) | 0.96 (0.49, 1.89) | 0.97                          |
| Adjusted OR (95% CI)                          | 1.00  | 0.65 (0.31, 1.38) | 0.69 (0.33, 1.45) | 0.50 (0.23, 1.08) | 0.73 (0.35, 1.51) | 0.44                          |
| <b>18:1 <i>trans</i></b>                      |       |                   |                   |                   |                   |                               |
| Median                                        | 0.32  | 0.43              | 0.50              | 0.62              | 0.91              |                               |
| Controls:Cases                                | 47:32 | 47:22             | 47:16             | 47:22             | 47:17             |                               |
| Unadjusted OR (95% CI)                        | 1.00  | 0.69 (0.35, 1.35) | 0.50 (0.24, 1.03) | 0.69 (0.35, 1.35) | 0.53 (0.26, 1.08) | 0.14                          |
| Adjusted OR (95% CI)                          | 1.00  | 0.58 (0.28, 1.18) | 0.50 (0.24, 1.05) | 0.66 (0.33, 1.34) | 0.55 (0.26, 1.16) | 0.23                          |

| Fatty acid <sup>1</sup>              | Q1    | Q2                | Q3                | Q4                | Q5                | <i>P</i> , trend <sup>4</sup> |
|--------------------------------------|-------|-------------------|-------------------|-------------------|-------------------|-------------------------------|
| <i>18:2 trans</i>                    |       |                   |                   |                   |                   |                               |
| Median                               | 0.16  | 0.30              | 0.35              | 0.41              | 0.55              |                               |
| Controls:Cases                       | 47:24 | 47:19             | 47:30             | 47:24             | 47:12             |                               |
| Unadjusted OR (95% CI)               | 1.00  | 0.79 (0.38, 1.63) | 1.25 (0.64, 2.45) | 1.00 (0.50, 2.00) | 0.50 (0.22, 1.12) | 0.17                          |
| Adjusted OR (95% CI)                 | 1.00  | 0.73 (0.34, 1.55) | 1.20 (0.59, 2.44) | 1.01 (0.49, 2.09) | 0.44 (0.19, 1.00) | 0.12                          |
| Total <i>trans</i> -fatty acids      |       |                   |                   |                   |                   |                               |
| Median                               | 0.75  | 0.94              | 1.10              | 1.25              | 1.59              |                               |
| Controls:Cases                       | 47:27 | 47:21             | 47:29             | 47:13             | 47:19             |                               |
| Unadjusted OR (95% CI)               | 1.00  | 0.78 (0.39, 1.56) | 1.07 (0.55, 2.08) | 0.48 (0.22, 1.05) | 0.70 (0.35, 1.44) | 0.23                          |
| Adjusted OR (95% CI)                 | 1.00  | 0.73 (0.35, 1.51) | 1.04 (0.52, 2.06) | 0.45 (0.20, 1.00) | 0.68 (0.33, 1.43) | 0.23                          |
| Enzyme activity indices              |       |                   |                   |                   |                   |                               |
| Stearoyl-coA-desaturase 18:1n-9/18:0 |       |                   |                   |                   |                   |                               |
| Median                               | 2.28  | 2.68              | 2.91              | 3.15              | 3.55              |                               |
| Controls:Cases                       | 47:15 | 47:21             | 47:16             | 47:22             | 47:35             |                               |
| Unadjusted OR (95% CI)               | 1.00  | 1.40 (0.64, 3.04) | 1.07 (0.47, 2.40) | 1.47 (0.68, 3.17) | 2.33 (1.13, 4.83) | 0.02                          |
| Adjusted OR (95% CI)                 | 1.00  | 1.39 (0.63, 3.08) | 1.03 (0.44, 2.37) | 1.39 (0.63, 3.08) | 2.38 (1.10, 5.18) | 0.03                          |
| Elongase 18:1n-7/16:1n-7             |       |                   |                   |                   |                   |                               |
| Median                               | 0.85  | 1.08              | 1.29              | 1.51              | 1.87              |                               |
| Controls:Cases                       | 47:16 | 47:20             | 47:21             | 47:20             | 47:32             |                               |
| Unadjusted OR (95% CI)               | 1.00  | 1.25 (0.58, 2.70) | 1.31 (0.61, 2.82) | 1.25 (0.58, 2.70) | 2.00 (0.97, 4.12) | 0.06                          |
| Adjusted OR (95% CI)                 | 1.00  | 1.10 (0.49, 2.44) | 1.16 (0.53, 2.57) | 1.06 (0.47, 2.39) | 1.77 (0.82, 3.84) | 0.14                          |
| Δ6-desaturase 18:3n-6/18:2n-6        |       |                   |                   |                   |                   |                               |
| Median                               | 0.002 | 0.006             | 0.009             | 0.012             | 0.016             |                               |
| Controls:Cases                       | 47:17 | 47:16             | 47:27             | 47:25             | 47:24             |                               |
| Unadjusted OR (95% CI)               | 1.00  | 0.94 (0.43, 2.08) | 1.59 (0.77, 3.29) | 1.47 (0.70, 3.07) | 1.41 (0.67, 2.96) | 0.21                          |
| Adjusted OR (95% CI)                 | 1.00  | 0.94 (0.41, 2.14) | 1.31 (0.61, 2.82) | 1.22 (0.56, 2.68) | 1.09 (0.50, 2.41) | 0.70                          |

| Fatty acid <sup>1</sup>               | Q1    | Q2                | Q3                | Q4                | Q5                | <i>P</i> , trend <sup>4</sup> |
|---------------------------------------|-------|-------------------|-------------------|-------------------|-------------------|-------------------------------|
| $\Delta$ 5-desaturase 20:4n-6/20:3n-6 |       |                   |                   |                   |                   |                               |
| Median                                | 2.89  | 3.80              | 4.50              | 5.16              | 6.77              |                               |
| Controls:Cases                        | 47:15 | 47:12             | 47:14             | 47:22             | 47:46             |                               |
| Unadjusted OR (95% CI)                | 1.00  | 0.80 (0.34, 1.89) | 0.93 (0.41, 2.15) | 1.47 (0.68, 3.17) | 3.07 (1.51, 6.23) | <0.0001                       |
| Adjusted OR (95% CI)                  | 1.00  | 1.01 (0.41, 2.49) | 1.06 (0.44, 2.52) | 1.70 (0.76, 3.82) | 4.11 (1.90, 8.88) | <0.0001                       |



**Footnotes to Supplemental Table 1**

- <sup>1</sup> SFA, saturated fatty acid; MUFA, monounsaturated fatty acid; PUFA, polyunsaturated fatty acid; EPA, eicosapentaenoic acid; DPA, docosapentaenoic acid; DHA, docosahexaenoic acid; EDA, eicosadienoic acid; CLA, conjugated linoleic acid.
- <sup>2</sup> From unconditional logistic regression models with case status (dengue hemorrhagic fever/dengue shock syndrome) as the outcome and indicator variables for quintiles 2 to 5 of the FA as predictors.
- <sup>3</sup> From unconditional logistic regression models with case status as the outcome and predictors that included sex (1 indicator for male), age (1 indicator for <15 y), hours with fever before consultation (1 indicator for  $\geq 72$  h), interleukin-10 (continuous), tumor necrosis factor- $\alpha$  (continuous), and indicator variables for quintiles 2 to 5 of the FA as predictors.
- <sup>4</sup> Wald test for a variable representing the median of each FA quartile that was introduced into the logistic regression model as a continuous predictor.
- <sup>5</sup> Sum of 20:5n-3 EPA, 22:5n-3 DPA, and 22:6n-3 DHA.
- <sup>6</sup> Sum of 20:2n-6 EDA, 20:3n-6 dihomo- $\gamma$ -linolenic acid, 20:4n-6 arachidonic acid, and 22:4n-6 adrenic acid.

**Supplemental Table 2.** Spearman correlations of serum fatty acids (FA) % with cytokine concentrations at the time of dengue fever diagnosis and >1 y post-convalescence.

| Fatty acid <sup>1</sup>                 | At the time of dengue fever diagnosis |        |       |               |               |        |       |               | >1 y post-convalescence |       |       |               |
|-----------------------------------------|---------------------------------------|--------|-------|---------------|---------------|--------|-------|---------------|-------------------------|-------|-------|---------------|
|                                         | Controls (n=245)                      |        |       |               | Cases (n=109) |        |       |               | (n=44)                  |       |       |               |
|                                         | IFN- $\gamma$                         | IL-10  | IL-6  | TNF- $\alpha$ | IFN- $\gamma$ | IL-10  | IL-6  | TNF- $\alpha$ | IFN- $\gamma$           | IL-10 | IL-6  | TNF- $\alpha$ |
| <b>SFAs</b>                             |                                       |        |       |               |               |        |       |               |                         |       |       |               |
| 14:0 myristic acid                      | -0.02                                 | 0.05   | 0.00  | 0.00          | 0.06          | 0.11   | 0.00  | 0.26*         | 0.06                    | 0.21  | 0.08  | -0.01         |
| 15:0 pentadecanoic acid                 | 0.04                                  | 0.03   | 0.08  | 0.05          | -0.03         | 0.09   | -0.10 | 0.09          | 0.01                    | 0.04  | 0.02  | 0.19          |
| 16:0 palmitic acid                      | -0.02                                 | 0.20*  | -0.03 | 0.12          | 0.07          | 0.26*  | -0.16 | 0.17          | 0.08                    | 0.16  | -0.08 | -0.24         |
| 17:0 margaric acid                      | -0.06                                 | -0.09  | -0.01 | 0.06          | -0.30*        | 0.04   | -0.03 | -0.17         | 0.11                    | 0.13  | 0.16  | 0.41*         |
| 18:0 stearic acid                       | -0.09                                 | -0.07  | -0.07 | -0.02         | -0.16         | -0.14  | 0.01  | 0.05          | -0.06                   | -0.03 | -0.10 | 0.20          |
| 20:0 arachidic acid                     | 0.04                                  | 0.01   | 0.04  | -0.14*        | 0.03          | -0.20* | 0.01  | 0.13          | -0.08                   | 0.01  | -0.15 | 0.01          |
| 22:0 behenic acid                       | 0.07                                  | -0.02  | -0.03 | -0.02         | -0.02         | -0.14  | -0.15 | 0.08          | -0.25                   | -0.04 | -0.15 | -0.18         |
| 24:0 lignoceric acid                    | 0.07                                  | -0.03  | -0.03 | 0.00          | 0.17          | -0.04  | 0.01  | 0.02          | -0.25                   | -0.11 | -0.18 | -0.05         |
| Total SFAs                              | -0.06                                 | 0.12   | -0.06 | 0.09          | -0.03         | 0.12   | -0.10 | 0.16          | 0.06                    | 0.15  | -0.13 | -0.16         |
| <b>MUFAs (%)</b>                        |                                       |        |       |               |               |        |       |               |                         |       |       |               |
| 16:1n-7 palmitoleic acid                | 0.05                                  | 0.02   | 0.09  | 0.08          | -0.07         | 0.12   | 0.12  | 0.22*         | 0.06                    | 0.13  | 0.02  | 0.12          |
| 18:1n-9 oleic acid                      | 0.06                                  | 0.34*  | 0.13  | 0.25*         | 0.04          | 0.44*  | 0.05  | -0.07         | -0.08                   | 0.00  | 0.05  | 0.15          |
| 18:1n-7 <i>cis</i> -vaccenic acid       | 0.06                                  | 0.07   | 0.07  | 0.19*         | 0.07          | 0.24*  | -0.14 | 0.07          | -0.14                   | 0.02  | 0.15  | 0.06          |
| 20:1n-9 gondoic acid                    | 0.06                                  | 0.26*  | 0.17* | 0.07          | -0.03         | 0.23*  | -0.05 | 0.07          | -0.11                   | 0.20  | 0.00  | 0.12          |
| 24:1n-9 nervonic acid                   | 0.05                                  | -0.01  | 0.04  | 0.02          | 0.13          | -0.03  | 0.02  | 0.08          | -0.17                   | -0.07 | -0.25 | 0.10          |
| Total MUFAs                             | 0.06                                  | 0.30*  | 0.13* | 0.25*         | 0.06          | 0.46*  | 0.05  | 0.00          | -0.05                   | 0.05  | 0.08  | 0.15          |
| <b>n-3 PUFAs (%)</b>                    |                                       |        |       |               |               |        |       |               |                         |       |       |               |
| 18:3n-3 $\alpha$ -linolenic acid        | -0.16*                                | -0.02  | -0.09 | -0.13         | -0.10         | -0.09  | 0.18  | 0.04          | 0.02                    | -0.13 | 0.09  | 0.19          |
| 20:5n-3 EPA                             | -0.05                                 | -0.19* | 0.06  | 0.01          | -0.24*        | -0.41* | -0.04 | -0.01         | 0.01                    | 0.17  | -0.22 | 0.16          |
| 22:5n-3 DPA                             | -0.04                                 | -0.14* | -0.05 | -0.05         | -0.15         | -0.18  | -0.10 | -0.05         | -0.03                   | -0.04 | 0.01  | 0.37*         |
| 22:6n-3 DHA                             | -0.01                                 | 0.02   | -0.02 | -0.04         | -0.02         | -0.15  | 0.07  | -0.03         | 0.06                    | 0.09  | -0.22 | 0.04          |
| Total long chain n-3 PUFAs <sup>2</sup> | -0.02                                 | -0.04  | -0.02 | -0.05         | -0.10         | -0.21* | 0.03  | -0.06         | 0.06                    | 0.13  | -0.24 | 0.14          |
| Total n-3 PUFAs                         | -0.06                                 | -0.04  | -0.04 | -0.08         | -0.12         | -0.21* | 0.10  | -0.09         | 0.10                    | 0.15  | -0.22 | 0.24          |

| Fatty acid <sup>1</sup>                  | At the time of dengue fever diagnosis |        |       |               |               |        |        |               | >1 y post-convalescence |       |       |               |
|------------------------------------------|---------------------------------------|--------|-------|---------------|---------------|--------|--------|---------------|-------------------------|-------|-------|---------------|
|                                          | Controls (n=245)                      |        |       |               | Cases (n=109) |        |        |               | (n=44)                  |       |       |               |
|                                          | IFN- $\gamma$                         | IL-10  | IL-6  | TNF- $\alpha$ | IFN- $\gamma$ | IL-10  | IL-6   | TNF- $\alpha$ | IFN- $\gamma$           | IL-10 | IL-6  | TNF- $\alpha$ |
| <b>n-6 PUFAs (%)</b>                     |                                       |        |       |               |               |        |        |               |                         |       |       |               |
| 18:2n-6 linoleic acid                    | -0.04                                 | -0.24* | -0.08 | -0.21*        | 0.02          | -0.30* | -0.02  | -0.03         | 0.03                    | -0.20 | 0.16  | -0.08         |
| 18:3n-6 $\gamma$ -linolenic acid         | 0.19*                                 | -0.06  | 0.12  | 0.17          | 0.10          | -0.02  | -0.25* | 0.15          | -0.04                   | 0.39* | -0.01 | 0.04          |
| 20:2n-6 EDA                              | 0.08                                  | 0.03   | 0.06  | 0.09          | 0.09          | 0.16   | 0.00   | 0.13          | -0.18                   | -0.06 | -0.01 | 0.03          |
| 20:3n-6 dihomo- $\gamma$ -linolenic acid | -0.05                                 | -0.17* | 0.01  | -0.03         | -0.08         | -0.23* | 0.13   | 0.16          | -0.05                   | 0.04  | -0.10 | 0.22          |
| 20:4n-6 arachidonic acid                 | -0.03                                 | -0.17* | -0.02 | -0.13         | -0.05         | -0.34* | 0.04   | -0.04         | 0.01                    | 0.12  | -0.22 | 0.05          |
| 22:4n-6 adrenic acid                     | 0.14*                                 | 0.02   | 0.07  | 0.14*         | 0.04          | -0.09  | -0.07  | 0.07          | -0.13                   | 0.03  | -0.04 | 0.10          |
| Total long chain n-6 PUFAs <sup>3</sup>  | -0.03                                 | -0.21* | 0.00  | -0.08         | -0.10         | -0.37* | 0.04   | -0.03         | -0.09                   | 0.07  | -0.18 | 0.09          |
| Total n-6 PUFAs                          | -0.03                                 | -0.28* | -0.05 | -0.21*        | -0.06         | -0.41* | 0.00   | -0.09         | -0.01                   | -0.17 | 0.09  | -0.05         |
| 18:2n-7 $ct$ CLA (%)                     | -0.11                                 | -0.09  | -0.11 | -0.12         | -0.15         | -0.03  | -0.04  | -0.16         | -0.08                   | 0.03  | -0.07 | 0.22          |
| <b>trans-FA (%)</b>                      |                                       |        |       |               |               |        |        |               |                         |       |       |               |
| 16:1n-7 <i>trans</i>                     | 0.02                                  | 0.03   | 0.01  | 0.09          | 0.02          | 0.03   | 0.00   | 0.25*         | 0.01                    | 0.37* | 0.00  | 0.20          |
| 18:1 <i>trans</i>                        | 0.06                                  | -0.03  | 0.08  | 0.02          | 0.12          | 0.02   | 0.02   | 0.05          | -0.07                   | 0.19  | -0.04 | 0.17          |
| 18:2 <i>trans</i>                        | 0.05                                  | 0.01   | 0.07  | -0.03         | -0.10         | -0.20* | 0.02   | -0.05         | 0.08                    | 0.14  | 0.10  | -0.11         |
| Total <i>trans</i> -FA                   | 0.01                                  | -0.05  | 0.09  | 0.02          | 0.04          | -0.08  | 0.00   | 0.05          | -0.02                   | 0.21  | 0.01  | 0.10          |
| <b>Enzyme activity indices</b>           |                                       |        |       |               |               |        |        |               |                         |       |       |               |
| Stearoyl-coA-desaturase 18:0/18:1n-9     | 0.09                                  | 0.28*  | 0.13* | 0.16*         | 0.12          | 0.39*  | 0.02   | -0.05         | -0.03                   | 0.08  | 0.09  | 0.00          |
| Elongase 18:1n-7/16:1n-7                 | 0.02                                  | 0.05   | -0.01 | 0.08          | 0.07          | 0.01   | -0.27* | -0.12         | -0.18                   | -0.10 | 0.11  | -0.10         |
| $\Delta$ 6-desaturase 18:3n-6/18:2n-6    | 0.20*                                 | 0.00   | 0.13  | 0.21*         | 0.10          | 0.04   | -0.25* | 0.16          | -0.07                   | 0.41* | -0.05 | 0.05          |
| $\Delta$ 5-desaturase 20:4n-6/20:3n-6    | 0.00                                  | 0.02   | -0.02 | -0.09         | 0.03          | -0.04  | -0.07  | -0.18         | 0.07                    | 0.07  | -0.07 | -0.21         |

### Footnotes to Supplemental Table 2

- <sup>1</sup> SFA, saturated fatty acid; MUFA, monounsaturated fatty acid; PUFA, polyunsaturated fatty acid; EPA, eicosapentaenoic acid; DPA, docosapentaenoic acid; DHA, docosahexaenoic acid; EDA, eicosadienoic acid; CLA, conjugated linoleic acid.
- <sup>2</sup> Sum of 20:5n-3 EPA, 22:5n-3 DPA, and 22:6n-3 DHA.
- <sup>3</sup> Sum of 20:2n-6 EDA, 20:3n-6 dihomo- $\gamma$ -linolenic acid, 20:4n-6 arachidonic acid, and 22:4n-6 adrenic acid.
- \*  $P < 0.05$ .

**Supplemental Table 3.** Prevalence (%) of thrombocytopenia (platelet count < 100,000/mm<sup>3</sup>) at baseline by quintile (Q) of serum fatty acids (FA) %

| Fatty acid <sup>1</sup>                  | Q1   | Q2   | Q3   | Q4   | Q5   | P, trend <sup>2</sup> |
|------------------------------------------|------|------|------|------|------|-----------------------|
| <b>SFAs (%)</b>                          |      |      |      |      |      |                       |
| 14:0 myristic acid                       | 19.4 | 38.1 | 20.4 | 27.8 | 26.3 | 0.85                  |
| 15:0 pentadecanoic acid                  | 25.0 | 23.2 | 30.0 | 28.0 | 25.0 | 0.81                  |
| 16:0 palmitic acid                       | 24.1 | 22.4 | 31.8 | 20.0 | 34.1 | 0.35                  |
| 17:0 margaric acid                       | 25.4 | 17.9 | 37.5 | 31.5 | 17.1 | 0.71                  |
| 18:0 stearic acid                        | 41.3 | 27.1 | 19.1 | 31.6 | 6.7  | 0.0004                |
| 20:0 arachidic acid                      | 35.7 | 30.2 | 28.6 | 26.3 | 14.3 | 0.01                  |
| 22:0 behenic acid                        | 25.0 | 33.3 | 20.0 | 25.9 | 27.8 | 0.96                  |
| 24:0 lignoceric acid                     | 28.3 | 23.6 | 25.5 | 23.9 | 29.9 | 0.85                  |
| Total SFAs                               | 22.0 | 28.9 | 36.4 | 22.4 | 19.5 | 0.64                  |
| <b>MUFAs (%)</b>                         |      |      |      |      |      |                       |
| 16:1n-7 palmitoleic acid                 | 21.8 | 28.8 | 19.3 | 36.1 | 26.1 | 0.38                  |
| 18:1n-9 oleic acid                       | 18.9 | 15.3 | 25.5 | 32.0 | 42.6 | 0.0007                |
| 18:1n-7 <i>cis</i> -vaccenic acid        | 15.6 | 29.8 | 35.0 | 24.1 | 26.2 | 0.57                  |
| 20:1n-9 gondoic acid                     | 19.7 | 23.5 | 21.2 | 34.4 | 34.8 | 0.03                  |
| 24:1n-9 nervonic acid                    | 28.6 | 26.9 | 26.1 | 22.7 | 29.2 | 0.97                  |
| Total MUFAs                              | 12.8 | 22.4 | 24.5 | 28.9 | 42.4 | 0.0004                |
| <b>n-3 PUFA (%)</b>                      |      |      |      |      |      |                       |
| 18:3n-3 $\alpha$ -linolenic acid         | 27.0 | 23.7 | 19.2 | 37.3 | 26.1 | 0.56                  |
| 20:5n-3 EPA                              | 25.5 | 30.4 | 26.0 | 26.2 | 25.4 | 0.81                  |
| 22:5n-3 DPA                              | 16.1 | 21.6 | 21.7 | 26.3 | 44.3 | 0.0005                |
| 22:6n-3 DHA                              | 11.1 | 28.8 | 22.4 | 28.3 | 39.3 | 0.004                 |
| Total long chain n-3 PUFA <sup>4</sup>   | 14.0 | 30.8 | 16.1 | 30.2 | 40.0 | 0.003                 |
| Total n-3 PUFA                           | 16.3 | 23.7 | 21.2 | 28.1 | 42.6 | 0.002                 |
| <b>n-6 PUFA (%)</b>                      |      |      |      |      |      |                       |
| 18:2n-6 linoleic acid                    | 41.3 | 36.8 | 23.3 | 22.4 | 10.0 | <0.0001               |
| 18:3n-6 $\gamma$ -linolenic acid         | 40.8 | 26.8 | 27.0 | 17.0 | 23.1 | 0.02                  |
| 20:2n-6 EDA                              | 31.1 | 25.0 | 26.7 | 20.8 | 29.7 | 0.88                  |
| 20:3n-6 dihomo- $\gamma$ -linolenic acid | 33.3 | 32.1 | 28.8 | 17.0 | 20.8 | 0.05                  |
| 20:4n-6 arachidonic acid                 | 17.8 | 34.6 | 17.0 | 31.1 | 30.0 | 0.27                  |
| 22:4n-6 adrenic acid                     | 23.5 | 23.9 | 25.4 | 28.3 | 30.4 | 0.33                  |
| Total long chain n-6 PUFA <sup>5</sup>   | 26.8 | 27.1 | 21.0 | 27.3 | 30.8 | 0.53                  |
| Total n-6 PUFA                           | 36.4 | 35.7 | 21.2 | 23.4 | 18.2 | 0.01                  |
| 18:2n-7 $ct$ CLA (%)                     |      | 26.1 |      | 30.8 | 23.3 | 0.97                  |

| Fatty acid <sup>1</sup>              | Q1   | Q2   | Q3   | Q4   | Q5   | P, trend <sup>2</sup> |
|--------------------------------------|------|------|------|------|------|-----------------------|
| <i>trans</i> -fatty acids (%)        |      |      |      |      |      |                       |
| 16:1n-7 <i>trans</i>                 | 31.0 | 34.0 | 24.6 | 25.5 | 18.2 | 0.07                  |
| 18:1 <i>trans</i>                    | 26.2 | 38.9 | 27.7 | 22.4 | 17.0 | 0.08                  |
| 18:2 <i>trans</i>                    | 23.6 | 31.3 | 36.1 | 27.3 | 13.5 | 0.20                  |
| Total <i>trans</i> -fatty acids      | 34.5 | 30.4 | 30.5 | 19.6 | 15.4 | 0.01                  |
| Enzyme activity indices              |      |      |      |      |      |                       |
| Stearoyl-coA-desaturase 18:1n-9/18:0 | 9.4  | 25.5 | 20.8 | 18.9 | 51.5 | <0.0001               |
| Elongase 18:1n-7/16:1n-7             | 24.4 | 30.4 | 27.5 | 23.6 | 26.6 | 0.88                  |
| Δ6-desaturase 18:3n-6/18:2n-6        | 34.0 | 36.4 | 20.0 | 24.6 | 22.4 | 0.09                  |
| Δ5-desaturase 20:4n-6/20:3n-6        | 16.7 | 13.6 | 20.8 | 37.3 | 37.8 | 0.0006                |

**Footnotes to Supplemental Table 3**

- <sup>1</sup> SFA, saturated fatty acid; MUFA, monounsaturated fatty acid; PUFA, polyunsaturated fatty acid; EPA, eicosapentaenoic acid; DPA, docosapentaenoic acid; DHA, docosahexaenoic acid; EDA, eicosadienoic acid; CLA, conjugated linoleic acid.
- <sup>2</sup> Cochran-Armitage test.

**Supplemental Table 4.** Changes in serum fatty acids (FA) % from the time of consultation for the acute episode to >1 year post-convalescence in 44 participants<sup>1</sup>

| Fatty acid <sup>2</sup>                 | Acute dengue episode | Post-convalescence | P <sup>3</sup> |
|-----------------------------------------|----------------------|--------------------|----------------|
| <b>SFAs (%)</b>                         |                      |                    |                |
| 14:0 myristic acid                      | 0.32 ± 0.15          | 0.57 ± 0.28        | <0.0001        |
| 15:0 pentadecanoic acid                 | 0.16 ± 0.04          | 0.18 ± 0.05        | 0.04           |
| 16:0 palmitic acid                      | 23.36 ± 2.05         | 22.21 ± 2.14       | 0.009          |
| 17:0 margaric acid                      | 0.35 ± 0.05          | 0.33 ± 0.07        | 0.38           |
| 18:0 stearic acid                       | 7.93 ± 0.78          | 8.27 ± 0.98        | 0.06           |
| 20:0 arachidic acid                     | 0.14 ± 0.04          | 0.18 ± 0.07        | 0.002          |
| 22:0 behenic acid                       | 0.29 ± 0.11          | 0.36 ± 0.12        | 0.008          |
| 24:0 lignoceric acid                    | 0.17 ± 0.17          | 0.28 ± 0.17        | 0.01           |
| Total SFAs                              | 32.69 ± 2.30         | 32.15 ± 2.43       | 0.24           |
| <b>MUFAs (%)</b>                        |                      |                    |                |
| 16:1n-7 palmitoleic acid                | 1.63 ± 0.53          | 1.84 ± 0.59        | 0.03           |
| 18:1n-9 oleic acid                      | 23.95 ± 3.01         | 19.49 ± 2.55       | <0.0001        |
| 18:1n-7 <i>cis</i> -vaccenic acid       | 1.97 ± 0.49          | 1.80 ± 0.43        | 0.03           |
| 20:1n-9 gondoic acid                    | 0.21 ± 0.08          | 0.17 ± 0.05        | 0.002          |
| 24:1n-9 nervonic acid                   | 0.27 ± 0.20          | 0.20 ± 0.19        | 0.06           |
| Total MUFAs                             | 28.11 ± 3.47         | 23.52 ± 2.87       | <0.0001        |
| <b>n-3 PUFAs (%)</b>                    |                      |                    |                |
| 18:3n-3 α-linolenic acid                | 0.37 ± 0.12          | 0.49 ± 0.16        | <0.0001        |
| 20:5n-3 EPA                             | 0.28 ± 0.16          | 0.34 ± 0.15        | 0.03           |
| 22:5n-3 DPA                             | 0.41 ± 0.18          | 0.49 ± 0.14        | 0.01           |
| 22:6n-3 DHA                             | 1.93 ± 1.01          | 1.67 ± 0.49        | 0.14           |
| Total long chain n-3 PUFAs <sup>4</sup> | 2.61 ± 1.09          | 2.50 ± 0.61        | 0.56           |
| Total n-3 PUFAs                         | 3.12 ± 1.10          | 3.10 ± 0.62        | 0.92           |
| <b>n-6 PUFAs (%)</b>                    |                      |                    |                |
| 18:2n-6 linoleic acid                   | 26.76 ± 4.04         | 29.40 ± 4.23       | <0.0001        |
| 18:3n-6 γ-linolenic acid                | 0.11 ± 0.07          | 0.28 ± 0.25        | <0.0001        |
| 20:2n-6 EDA                             | 0.21 ± 0.11          | 0.23 ± 0.11        | 0.39           |
| 20:3n-6 dihomo-γ-linolenic acid         | 1.24 ± 0.36          | 1.79 ± 0.43        | <0.0001        |
| 20:4n-6 arachidonic acid                | 6.08 ± 1.31          | 6.84 ± 1.33        | 0.003          |
| 22:4n-6 adrenic acid                    | 0.42 ± 0.46          | 1.38 ± 1.23        | <0.0001        |
| Total long chain n-6 PUFAs <sup>5</sup> | 7.96 ± 1.47          | 10.25 ± 2.26       | <0.0001        |
| Total n-6 PUFAs                         | 34.82 ± 4.71         | 39.93 ± 4.19       | <0.0001        |
| 18:2n-7 <sub>ct</sub> CLA (%)           | 0.06 ± 0.06          | 0.10 ± 0.16        | 0.14           |



| Fatty acid <sup>2</sup>              | Acute dengue episode | Post-convalescence | <i>P</i> <sup>3</sup> |
|--------------------------------------|----------------------|--------------------|-----------------------|
| <i>trans</i> -FA (%)                 |                      |                    |                       |
| 16:1n-7 <i>trans</i>                 | 0.25 ± 0.30          | 0.21 ± 0.07        | 0.34                  |
| 18:1 <i>trans</i>                    | 0.53 ± 0.58          | 0.53 ± 0.43        | 0.99                  |
| 18:2 <i>trans</i>                    | 0.42 ± 0.36          | 0.47 ± 0.20        | 0.44                  |
| Total <i>trans</i> -FA               | 1.20 ± 1.01          | 1.21 ± 0.65        | 0.98                  |
| Ratios                               |                      |                    |                       |
| Stearoyl-coA-desaturase 18:1n-9/18:0 | 3.05 ± 0.49          | 2.40 ± 0.46        | <0.0001               |
| Elongase 18:1n-7/16:1n-7             | 1.44 ± 1.04          | 1.05 ± 0.37        | 0.009                 |
| Δ6-desaturase 18:3n-6/18:2n-6        | 0.004 ± 0.003        | 0.010 ± 0.010      | 0.0002                |
| Δ5-desaturase 20:4n-6/20:3n-6        | 5.20 ± 2.06          | 3.99 ± 1.05        | 0.0002                |

#### Footnotes to Supplemental Table 4

- <sup>1</sup> Mean  $\pm$  SD.
- <sup>2</sup> SFA, saturated fatty acid; MUFA, monounsaturated fatty acid; PUFA, polyunsaturated fatty acid; EPA, eicosapentaenoic acid; DPA, docosapentaenoic acid; DHA, docosahexaenoic acid; EDA, eicosadienoic acid; CLA, conjugated linoleic acid.
- <sup>3</sup> Test for the mean change in FA percentage weight concentrations from the acute episode to post-convalescence, from a repeated measurements linear regression model with an independent covariance matrix to account for the intra-subject correlation of measurements.
- <sup>4</sup> Sum of 20:5n-3 EPA, 22:5n-3 DPA, and 22:6n-3 DHA.
- <sup>5</sup> Sum of 20:2n-6 EDA, 20:3n-6 dihomo- $\gamma$ -linolenic acid, 20:4n-6 arachidonic acid, and 22:4n-6 adrenic acid.

**Supplemental Table 5.** Changes in serum fatty acids (FA) % from the time of consultation for the acute episode to >1 year post-convalescence in 44 participants by case status<sup>1</sup>

| Fatty acid <sup>2</sup>                 | Controls (n=29)      |                    |                | Cases (n=15)         |                    |                | P <sup>4</sup> |
|-----------------------------------------|----------------------|--------------------|----------------|----------------------|--------------------|----------------|----------------|
|                                         | Acute dengue episode | Post-convalescence | P <sup>3</sup> | Acute dengue episode | Post-convalescence | P <sup>3</sup> |                |
| <b>SFAs (%)</b>                         |                      |                    |                |                      |                    |                |                |
| 14:0 myristic acid                      | 0.32 ± 0.15          | 0.56 ± 0.29        | 0.0001         | 0.32 ± 0.16          | 0.60 ± 0.27        | <0.0001        | 0.71           |
| 15:0 pentadecanoic acid                 | 0.15 ± 0.03          | 0.18 ± 0.06        | 0.06           | 0.16 ± 0.06          | 0.17 ± 0.04        | 0.22           | 0.54           |
| 16:0 palmitic acid                      | 23.26 ± 1.97         | 22.31 ± 2.26       | 0.07           | 23.53 ± 2.25         | 22.03 ± 1.93       | 0.04           | 0.53           |
| 17:0 margaric acid                      | 0.34 ± 0.04          | 0.33 ± 0.07        | 0.93           | 0.36 ± 0.06          | 0.33 ± 0.07        | 0.04           | 0.10           |
| 18:0 stearic acid                       | 7.82 ± 0.81          | 8.15 ± 0.96        | 0.13           | 8.12 ± 0.72          | 8.50 ± 1.02        | 0.25           | 0.91           |
| 20:0 arachidic acid                     | 0.13 ± 0.04          | 0.16 ± 0.06        | 0.03           | 0.15 ± 0.03          | 0.21 ± 0.09        | 0.01           | 0.33           |
| 22:0 behenic acid                       | 0.27 ± 0.10          | 0.35 ± 0.14        | 0.01           | 0.32 ± 0.12          | 0.36 ± 0.10        | 0.29           | 0.40           |
| 24:0 lignoceric acid                    | 0.19 ± 0.15          | 0.25 ± 0.18        | 0.22           | 0.14 ± 0.19          | 0.33 ± 0.13        | 0.005          | 0.11           |
| Total SFAs                              | 32.49 ± 2.32         | 32.12 ± 2.49       | 0.53           | 33.07 ± 2.31         | 32.19 ± 2.41       | 0.25           | 0.59           |
| <b>MUFAs (%)</b>                        |                      |                    |                |                      |                    |                |                |
| 16:1n-7 palmitoleic acid                | 1.56 ± 0.59          | 1.82 ± 0.59        | 0.04           | 1.77 ± 0.38          | 1.88 ± 0.60        | 0.42           | 0.43           |
| 18:1n-9 oleic acid                      | 23.61 ± 2.73         | 19.80 ± 2.58       | <0.0001        | 24.62 ± 3.48         | 18.89 ± 2.46       | <0.0001        | 0.08           |
| 18:1n-7 <i>cis</i> -vaccenic acid       | 1.91 ± 0.49          | 1.70 ± 0.40        | 0.03           | 2.08 ± 0.49          | 1.99 ± 0.43        | 0.52           | 0.45           |
| 20:1n-9 gondoic acid                    | 0.20 ± 0.09          | 0.17 ± 0.05        | 0.04           | 0.23 ± 0.06          | 0.18 ± 0.04        | 0.005          | 0.39           |
| 24:1n-9 nervonic acid                   | 0.30 ± 0.19          | 0.23 ± 0.22        | 0.14           | 0.20 ± 0.21          | 0.13 ± 0.09        | 0.20           | 0.97           |
| Total MUFAs                             | 27.67 ± 3.23         | 23.75 ± 2.99       | <0.0001        | 28.95 ± 3.86         | 23.08 ± 2.65       | <0.0001        | 0.12           |
| <b>n-3 PUFAs (%)</b>                    |                      |                    |                |                      |                    |                |                |
| 18:3n-3 $\alpha$ -linolenic acid        | 0.37 ± 0.13          | 0.47 ± 0.17        | 0.005          | 0.37 ± 0.10          | 0.54 ± 0.14        | 0.0003         | 0.27           |
| 20:5n-3 EPA                             | 0.24 ± 0.12          | 0.34 ± 0.15        | 0.02           | 0.34 ± 0.21          | 0.35 ± 0.15        | 0.76           | 0.16           |
| 22:5n-3 DPA                             | 0.37 ± 0.13          | 0.46 ± 0.12        | 0.01           | 0.49 ± 0.22          | 0.55 ± 0.15        | 0.35           | 0.61           |
| 22:6n-3 DHA                             | 1.95 ± 1.16          | 1.66 ± 0.52        | 0.22           | 1.87 ± 0.66          | 1.67 ± 0.44        | 0.37           | 0.79           |
| Total long chain n-3 PUFAs <sup>5</sup> | 2.56 ± 1.23          | 2.46 ± 0.64        | 0.69           | 2.71 ± 0.79          | 2.57 ± 0.56        | 0.61           | 0.93           |
| Total n-3 PUFAs                         | 3.09 ± 1.25          | 3.05 ± 0.65        | 0.88           | 3.18 ± 0.77          | 3.20 ± 0.57        | 0.94           | 0.88           |

| Fatty acid <sup>2</sup>                  | Controls (n=29)      |                    |                | Cases (n=15)         |                    |                | P <sup>4</sup> |
|------------------------------------------|----------------------|--------------------|----------------|----------------------|--------------------|----------------|----------------|
|                                          | Acute dengue episode | Post-convalescence | P <sup>3</sup> | Acute dengue episode | Post-convalescence | P <sup>3</sup> |                |
| <b>n-6 PUFAs (%)</b>                     |                      |                    |                |                      |                    |                |                |
| 18:2n-6 linoleic acid                    | 27.33 ± 4.01         | 29.68 ± 4.18       | 0.0004         | 25.65 ± 4.00         | 28.85 ± 4.42       | 0.02           | 0.56           |
| 18:3n-6 $\gamma$ -linolenic acid         | 0.10 ± 0.06          | 0.26 ± 0.23        | 0.0006         | 0.12 ± 0.09          | 0.32 ± 0.30        | 0.005          | 0.65           |
| 20:2n-6 EDA                              | 0.21 ± 0.13          | 0.22 ± 0.12        | 0.78           | 0.20 ± 0.07          | 0.25 ± 0.09        | 0.18           | 0.44           |
| 20:3n-6 dihomo- $\gamma$ -linolenic acid | 1.24 ± 0.38          | 1.80 ± 0.41        | <0.0001        | 1.24 ± 0.34          | 1.78 ± 0.48        | <0.0001        | 0.90           |
| 20:4n-6 arachidonic acid                 | 6.11 ± 1.32          | 6.77 ± 1.47        | 0.04           | 6.04 ± 1.34          | 6.99 ± 1.06        | 0.01           | 0.53           |
| 22:4n-6 adrenic acid                     | 0.35 ± 0.23          | 1.15 ± 1.18        | 0.0007         | 0.56 ± 0.71          | 1.84 ± 1.24        | 0.0005         | 0.23           |
| Total long chain n-6 PUFAs <sup>6</sup>  | 7.92 ± 1.42          | 9.93 ± 2.29        | 0.0002         | 8.03 ± 1.61          | 10.86 ± 2.15       | <0.0001        | 0.22           |
| Total n-6 PUFAs                          | 35.35 ± 4.65         | 39.88 ± 4.48       | <0.0001        | 33.8 ± 4.83          | 40.03 ± 3.72       | 0.0001         | 0.32           |
| 18:2n-7 <sub>ct</sub> CLA (%)            | 0.07 ± 0.07          | 0.07 ± 0.07        | 0.68           | 0.05 ± 0.03          | 0.14 ± 0.25        | 0.14           | 0.18           |
| <b>trans-FA (%)</b>                      |                      |                    |                |                      |                    |                |                |
| 16:1n-7 <i>trans</i>                     | 0.29 ± 0.36          | 0.20 ± 0.06        | 0.21           | 0.19 ± 0.11          | 0.22 ± 0.09        | 0.36           | 0.12           |
| 18:1 <i>trans</i>                        | 0.59 ± 0.70          | 0.48 ± 0.19        | 0.40           | 0.41 ± 0.18          | 0.62 ± 0.70        | 0.26           | 0.16           |
| 18:2 <i>trans</i>                        | 0.46 ± 0.44          | 0.44 ± 0.12        | 0.87           | 0.34 ± 0.13          | 0.52 ± 0.30        | 0.05           | 0.13           |
| Total <i>trans</i> -FA                   | 1.34 ± 1.20          | 1.13 ± 0.28        | 0.34           | 0.94 ± 0.33          | 1.36 ± 1.05        | 0.15           | 0.09           |
| <b>Enzyme activity indices</b>           |                      |                    |                |                      |                    |                |                |
| Stearoyl-coA-desaturase 18:1n-9/18:0     | 3.05 ± 0.47          | 2.47 ± 0.48        | <0.0001        | 3.06 ± 0.54          | 2.26 ± 0.40        | <0.0001        | 0.25           |
| Elongase 18:1n-7/16:1n-7                 | 1.57 ± 1.25          | 1.01 ± 0.38        | 0.01           | 1.21 ± 0.30          | 1.13 ± 0.32        | 0.37           | 0.04           |
| $\Delta$ 6-desaturase 18:3n-6/18:2n-6    | 0.004 ± 0.002        | 0.009 ± 0.009      | 0.003          | 0.005 ± 0.003        | 0.012 ± 0.012      | 0.01           | 0.59           |
| $\Delta$ 5-desaturase 20:4n-6/20:3n-6    | 5.27 ± 2.39          | 3.90 ± 1.05        | 0.003          | 5.08 ± 1.24          | 4.16 ± 1.06        | 0.0002         | 0.36           |

**Footnotes to Supplemental Table 5**

- <sup>1</sup> Mean  $\pm$  SD.
- <sup>2</sup> SFA, saturated fatty acid; MUFA, monounsaturated fatty acid; PUFA, polyunsaturated fatty acid; EPA, eicosapentaenoic acid; DPA, docosapentaenoic acid; DHA, docosahexaenoic acid; EDA, eicosadienoic acid; CLA, conjugated linoleic acid.
- <sup>3</sup> Wald test for the mean change in FA percentage weight concentrations from the acute episode to post-convalescence, from a repeated measurements linear regression model with an independent covariance matrix to account for the intra-subject correlation of measurements.
- <sup>4</sup> Wald test for case-control differences in mean change in FA percentage weight concentrations from the acute episode to post-convalescence.
- <sup>5</sup> Sum of 20:5n-3 EPA, 22:5n-3 DPA, and 22:6n-3 DHA.
- <sup>6</sup> Sum of 20:2n-6 EDA, 20:3n-6 dihomo- $\gamma$ -linolenic acid, 20:4n-6 arachidonic acid, and 22:4n-6 adrenic acid.

**Supplemental Table 6.** Distribution of serum fatty acids (FA) % according to dengue virus (DENV) serotype<sup>1</sup>

| Fatty acid <sup>2</sup>                 | DENV Serotype |             |             |             | <i>P</i> <sup>3</sup> |
|-----------------------------------------|---------------|-------------|-------------|-------------|-----------------------|
|                                         | 1<br>n = 20   | 2<br>n = 13 | 3<br>n = 29 | 4<br>n = 15 |                       |
| SFAs (%)                                |               |             |             |             |                       |
| 14:0 myristic acid                      | 0.29±0.10     | 0.32±0.23   | 0.32±0.17   | 0.30±0.17   | 0.92                  |
| 15:0 pentadecanoic acid                 | 0.16±0.06     | 0.16±0.06   | 0.16±0.05   | 0.15±0.06   | 0.84                  |
| 16:0 palmitic acid                      | 22.70±1.82    | 23.44±1.64  | 23.26±2.18  | 23.16±1.20  | 0.52                  |
| 17:0 margaric acid                      | 0.35±0.07     | 0.36±0.05   | 0.36±0.07   | 0.34±0.05   | 0.64                  |
| 18:0 stearic acid                       | 7.68±0.63     | 8.02±0.83   | 8.02±1.26   | 8.15±1.12   | 0.39                  |
| 20:0 arachidic acid                     | 0.15±0.05     | 0.17±0.03   | 0.17±0.08   | 0.15±0.05   | 0.44                  |
| 22:0 behenic acid                       | 0.31±0.14     | 0.40±0.11   | 0.40±0.12   | 0.29±0.10   | 0.001                 |
| 24:0 lignoceric acid                    | 0.25±0.17     | 0.39±0.09   | 0.37±0.14   | 0.20±0.17   | 0.001                 |
| Total SFAs                              | 31.87±2.07    | 33.26±2.15  | 33.04±2.65  | 32.73±1.49  | 0.25                  |
| MUFAs (%)                               |               |             |             |             |                       |
| 16:1n-7 palmitoleic acid                | 1.63±0.59     | 1.77±0.43   | 1.82±0.53   | 1.83±0.83   | 0.24                  |
| 18:1n-9 oleic acid                      | 22.56±3.64    | 22.05±2.48  | 23.33±2.79  | 23.18±2.36  | 0.40                  |
| 18:1n-7 cis-vaccenic acid               | 1.91±0.44     | 2.59±0.41   | 2.41±0.53   | 2.00±0.58   | 0.0002                |
| 20:1n-9 gondoic acid                    | 0.21±0.15     | 0.17±0.08   | 0.20±0.05   | 0.20±0.07   | 0.58                  |
| 24:1n-9 nervonic acid                   | 0.38±0.17     | 0.60±0.15   | 0.48±0.30   | 0.32±0.24   | 0.008                 |
| Total MUFAs                             | 26.76±4.07    | 27.42±2.89  | 28.34±3.10  | 27.68±2.67  | 0.31                  |
| n-3 PUFAs (%)                           |               |             |             |             |                       |
| 18:3n-3 α-linolenic acid                | 0.35±0.10     | 0.19±0.10   | 0.22±0.14   | 0.31±0.09   | 0.0002                |
| 20:5n-3 EPA                             | 0.31±0.11     | 0.33±0.10   | 0.28±0.19   | 0.30±0.09   | 0.08                  |
| 22:5n-3 DPA                             | 0.47±0.14     | 0.42±0.10   | 0.41±0.18   | 0.40±0.13   | 0.15                  |
| 22:6n-3 DHA                             | 1.73±0.51     | 1.48±0.52   | 1.45±0.64   | 2.00±0.89   | 0.02                  |
| Total long chain n-3 PUFAs <sup>4</sup> | 2.51±0.60     | 2.24±0.60   | 2.15±0.78   | 2.70±0.91   | 0.04                  |
| Total n-3 PUFAs                         | 3.01±0.66     | 2.42±0.63   | 2.42±0.89   | 3.14±0.94   | 0.006                 |

|                                          |             |             |             |             |         |
|------------------------------------------|-------------|-------------|-------------|-------------|---------|
| n-6 PUFAs (%)                            |             |             |             |             |         |
| 18:2n-6 linoleic acid                    | 28.34±4.87  | 25.95±2.22  | 26.82±3.76  | 26.25±2.35  | 0.06    |
| 18:3n-6 $\gamma$ -linolenic acid         | 0.16±0.10   | 0.33±0.10   | 0.24±0.09   | 0.15±0.12   | <0.0001 |
| 20:2n-6 EDA                              | 0.17±0.07   | 0.25±0.06   | 0.24±0.05   | 0.20±0.12   | 0.001   |
| 20:3n-6 dihomo- $\gamma$ -linolenic acid | 1.21±0.41   | 1.44±0.54   | 1.27±0.49   | 1.38±0.48   | 0.43    |
| 20:4n-6 arachidonic acid                 | 6.86±1.43   | 6.93±1.57   | 6.06±1.25   | 6.91±1.29   | 0.08    |
| 22:4n-6 adrenic acid                     | 0.51±0.63   | 0.96±0.92   | 0.52±0.36   | 0.42±0.20   | 0.009   |
| Total long chain n-6 PUFAs <sup>5</sup>  | 8.75±1.87   | 9.58±2.44   | 8.08±1.48   | 8.91±1.47   | 0.11    |
| Total n-6 PUFAs                          | 37.25±5.48  | 35.86±3.23  | 35.14±4.23  | 35.31±2.86  | 0.14    |
| 18:2n-7ct CLA (%)                        |             |             |             |             |         |
|                                          | 0.07±0.11   | 0.01±0.02   | 0.05±0.12   | 0.07±0.07   | 0.003   |
| trans-FA (%)                             |             |             |             |             |         |
| 16:1n-7 trans                            | 0.19±0.07   | 0.24±0.05   | 0.24±0.11   | 0.28±0.34   | 0.06    |
| 18:1 trans                               | 0.46±0.26   | 0.49±0.15   | 0.49±0.18   | 0.43±0.17   | 0.56    |
| 18:2 trans                               | 0.38±0.17   | 0.30±0.15   | 0.28±0.13   | 0.36±0.08   | 0.32    |
| Total trans-FA                           | 1.04±0.43   | 1.03±0.30   | 1.00±0.29   | 1.06±0.31   | 0.93    |
| Enzyme activity indices                  |             |             |             |             |         |
| Stearoyl-coA-desaturase 18:1n-9/18:0     | 2.95±0.50   | 2.78±0.46   | 2.97±0.54   | 2.88±0.37   | 0.48    |
| Elongase 18:1n-7/16:1n-7                 | 1.41±1.07   | 1.53±0.36   | 1.50±0.90   | 1.51±1.30   | 0.03    |
| $\Delta$ 6-desaturase 18:3n-6/18:2n-6    | 0.006±0.005 | 0.013±0.004 | 0.009±0.004 | 0.006±0.005 | 0.0001  |
| $\Delta$ 5-desaturase 20:4n-6/20:3n-6    | 6.06±2.53   | 5.19±1.62   | 5.40±2.66   | 5.48±2.80   | 0.40    |

### Footnotes to Supplemental Table 6

<sup>1</sup> Mean  $\pm$  SD.

<sup>2</sup> SFA, saturated fatty acid; MUFA, monounsaturated fatty acid; PUFA, polyunsaturated fatty acid; EPA, eicosapentaenoic acid; DPA, docosapentaenoic acid; DHA, docosahexaenoic acid; EDA, eicosadienoic acid; CLA, conjugated linoleic acid.

<sup>3</sup> Wilcoxon rank-sum test.

<sup>4</sup> Sum of 20:5n-3 EPA, 22:5n-3 DPA, and 22:6n-3 DHA.

<sup>5</sup> Sum of 20:2n-6 EDA, 20:3n-6 dihomo- $\gamma$ -linolenic acid, 20:4n-6 arachidonic acid, and 22:4n-6 adrenic acid.



Supplemental Figure 1. Distribution of serum fatty acids (FA) % in dengue fever controls and dengue hemorrhagic fever/dengue shock syndrome cases

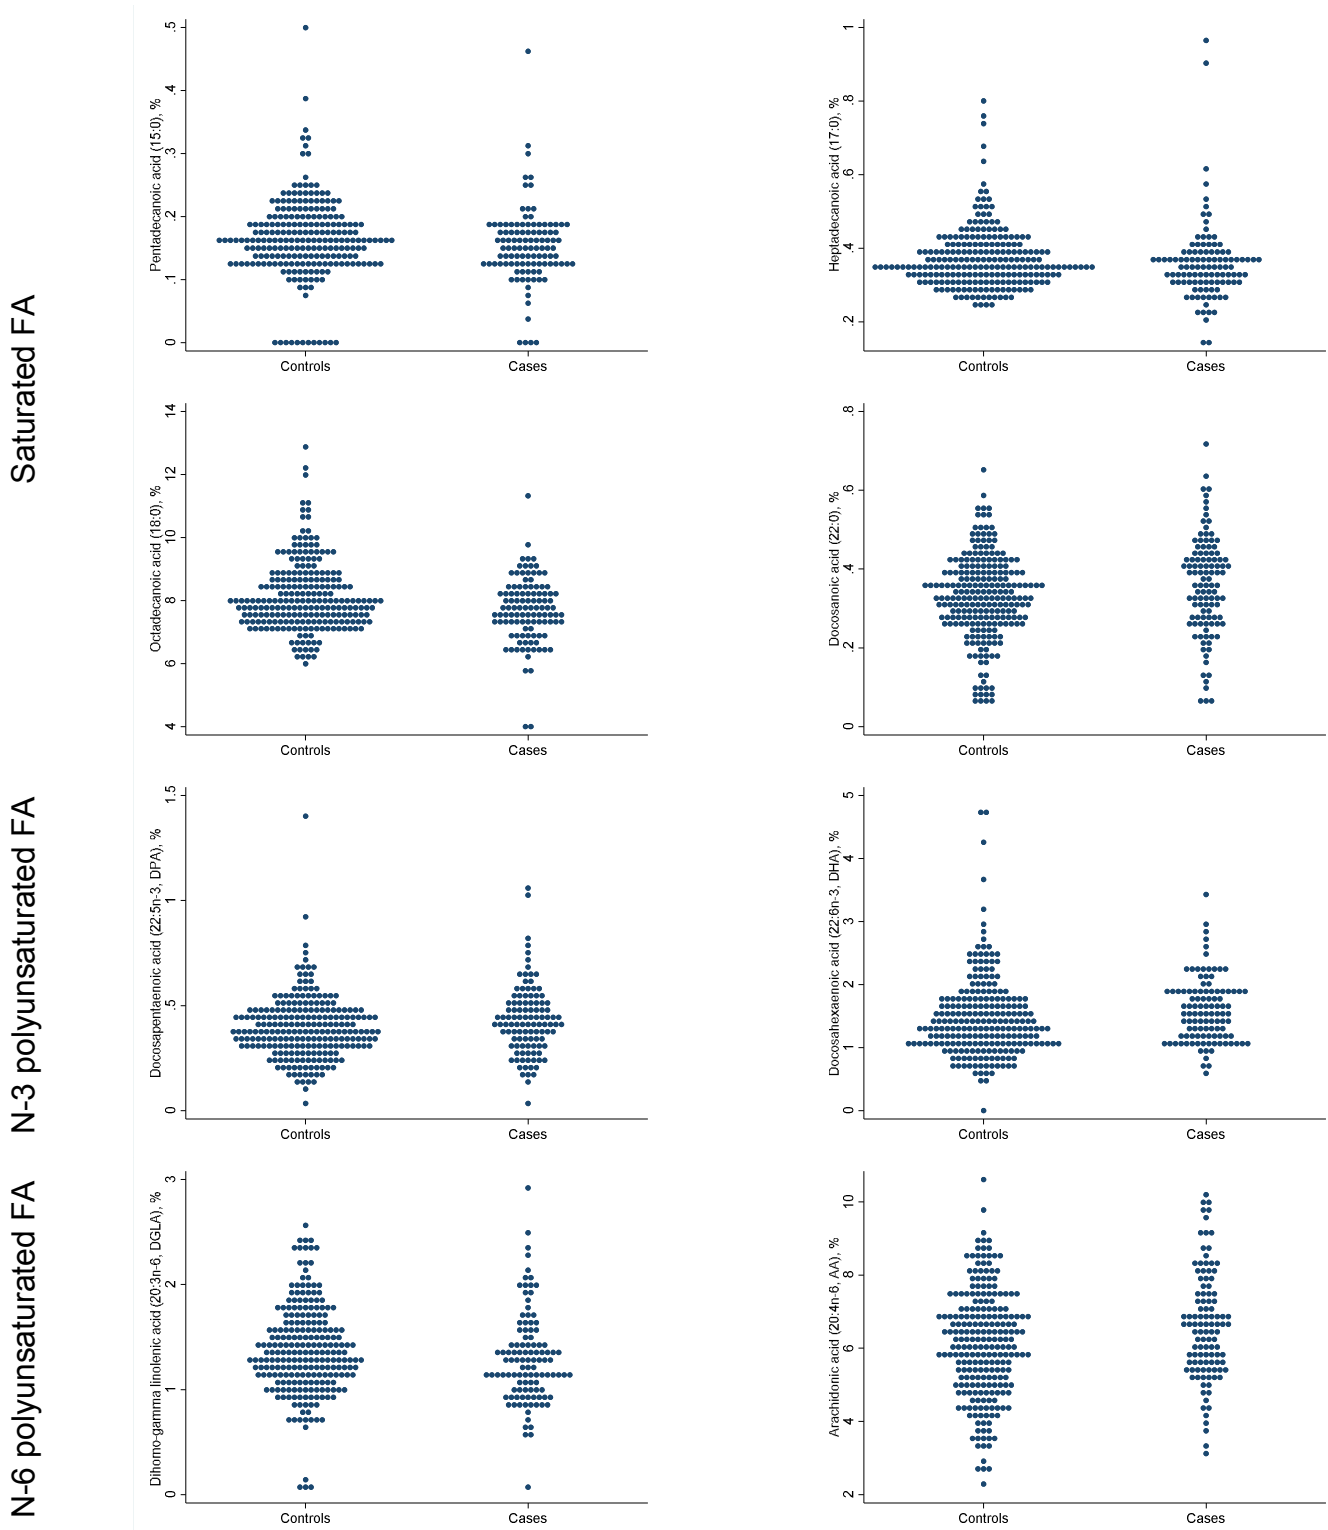

Supplemental Figure 1 (continued).

Enzyme activity indices

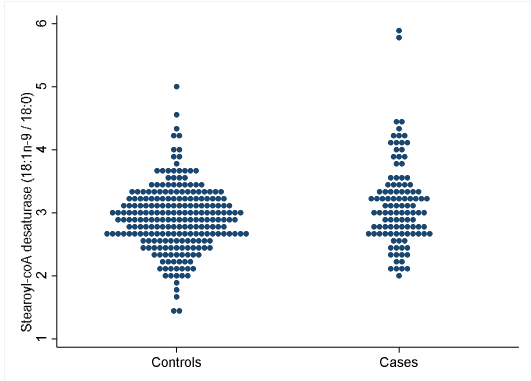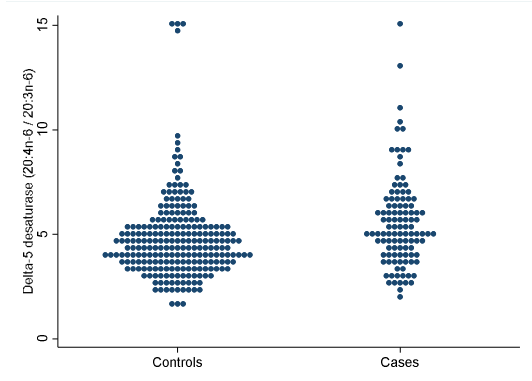

Supplement: NIHMS980192-supplement-1.pdf [file NIHMS980192-supplement-1.pdf]
